# Supplementary material
Source: PubMed Central journal article supplement (PMC6097133)
Supplement: blood830737-suppl1.pdf [file blood830737-suppl1.pdf]

## Supplemental Material and Methods

### Mouse strains

Transgenic mice expressing platelet-specific hPF4<sup>1</sup> (hPF4+) and/or the R131 isoform of human FcγRIIA<sup>2</sup> (FcγRIIA+) were studied. All transgenic mice were on a Cxcl4<sup>-/-</sup> background<sup>3</sup>. Genetic alterations were confirmed by the appropriate PCR analyses<sup>1-3</sup>. Mice were studied at 8 to 12 weeks of age. Both male and female mice were studied.

### Recombinant proteins and antibodies

Wildtype human (h) PF4 in the plasmid pMT/BiP/V5-His (Invitrogen) was expressed using the Drosophila Expression System (Invitrogen), purified, and characterized as described<sup>4</sup>. Total protein concentrations were determined using the bicinchoninic acid protein assay (Pierce) with the bovine serum albumin (BSA) provided as the standard. hPF4 was conjugated with fluorescein isothiocyanate (FITC) after its heparin-binding sites were protected by binding to heparin-agarose beads (Sigma) as described<sup>5</sup>. FITC-labeled PF4 formed antigenic complexes with heparin and with membrane glycosaminoglycans in the same manner as unlabeled PF4 as tested by ELISA (Figure 1A,B) or flow cytometry (Figure 1C)

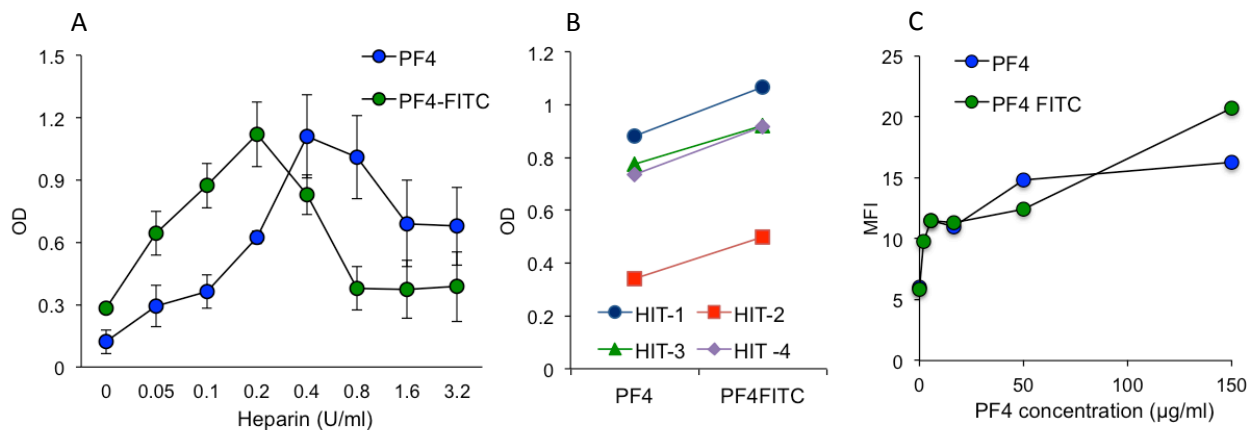

Supplemental Methods Figure 1: **FITC labeled PF4 forms PF4/heparin complexes that are recognized by KKO (A,C) or HIT IgG.** **A.** Binding of KKO to microtiter wells coated with PF4 or PF4-FITC (10 μg/ml) with heparin at the concentrations indicated on the x axis (0-3.2 U/ml). **B.** Binding of HIT Ig (10μg/ml) to microtiter wells coated with PF4 or PF4-FITC plus heparin (0.2U/ml). **C.** Binding of Alexa 647-labeled KKO to platelets incubated with PF4 or PF4-FITC at the concentrations indicated on the x axis (0-150 μg/ml) measured in whole blood.

The HIT-like monoclonal antibody (moAb) KKO the anti-PF4 monomeric moAb RTO and an isotype control moAb TRA (all mouse IgG2b $\kappa$ ), were purified from supernatants of hybridoma cells<sup>6</sup>. Anti-human (h) CD41a moAb conjugated to tandem conjugate system peridinin-chlorophyll-protein (PerCP) and cyanine 5.5 (Cy5.5) (hCD41a-PerCP-Cy5.5), anti-hCD14 conjugated to allophycocyanin (APC) (hCD14-APC), anti-hCD45-PerCP, anti-mouse (m) CD45-PerCP (anti-mCD45-PerCP), anti-mCD11b PE and purified rat anti-mCD16/CD32 (Mouse BD Fc Block™) were from BD Pharmingen. Rat anti-mCD115 PE moAb was from eBioscience. FITC-labeled annexin V was from Abcam. KKO, TRA, affinity purified rabbit polyclonal anti hPF4 (Sigma-Genosys) and Fab fragments from the rat anti-mCD41 antibody (BD Pharmingen) were conjugated with Alexa488 or Alexa647 using Alexa Fluor Protein labeling kits (Thermo Scientific). Biotinylated rat anti-mCD45 antibody was from BioLegend.

## References

1. Zhang C, Thornton MA, Kowalska MA, et al. Localization of distal regulatory domains in the megakaryocyte-specific platelet basic protein/platelet factor 4 gene locus. *Blood*. 2001;98(3):610-617.
2. McKenzie SE, Taylor SM, Malladi P, et al. The role of the human Fc receptor Fc gamma RIIA in the immune clearance of platelets: a transgenic mouse model. *J Immunol*. 1999;162(7):4311-4318.
3. Eslin DE, Zhang C, Samuels KJ, et al. Transgenic mice studies demonstrate a role for platelet factor 4 in thrombosis: dissociation between anticoagulant and antithrombotic effect of heparin. *Blood*. 2004;104(10):3173-3180.
4. Sachais BS, Litvinov RI, Yarovoi SV, et al. Dynamic antibody-binding properties in the pathogenesis of HIT. *Blood*. 2012;120(5):1137-1142.
5. Newman PM, Swanson RL, Chong BH. Heparin-induced thrombocytopenia: IgG binding to PF4-heparin complexes in the fluid phase and cross-reactivity with low molecular weight heparin and heparinoid. *Thromb Haemost*. 1998;80(2):292-297.
6. Arepally GM, Kamei S, Park KS, et al. Characterization of a murine monoclonal antibody that mimics heparin-induced thrombocytopenia antibodies. *Blood*. 2000;95(5):1533-1540.

## Supplemental Figures

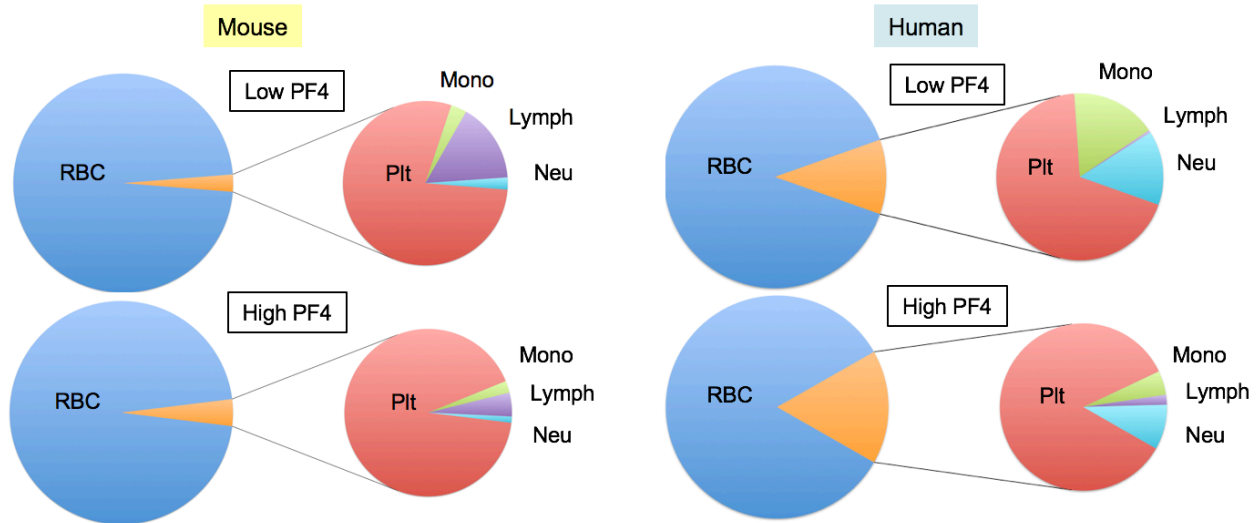

**Supplement Figure 1. In vitro distribution of bound PF4 in whole mouse or human blood.**

Figure is based on the same studies as Figure 1, but corrected for estimated total surface area of individual cell type using the absolute number of analyzed cells in the sample and the following surface area for cell types (mouse/human): platelet =  $3.5 \mu\text{m}^2/8 \mu\text{m}^2$ ; red blood cell =  $96 \mu\text{m}^2/134 \mu\text{m}^2$ ; lymphocyte =  $124 \mu\text{m}^2/167 \mu\text{m}^2$ ; neutrophil =  $353 \mu\text{m}^2/216 \mu\text{m}^2$ ; and monocyte =  $491 \mu\text{m}^2/243.3 \mu\text{m}^2$ .

1. O'Connell KE, Mikkola AM, Stepanek AM, et al. Practical murine hematopathology: a comparative review and implications for research. *Comp Med*. 2015;65(2):96-113.
2. von Hundelshausen P, Weber C. Platelets as immune cells: bridging inflammation and cardiovascular disease. *Circ Res*. 2007;100(1):27-40.
3. Linderkamp O, Wu PY, Meiselman HJ. Geometry of neonatal and adult red blood cells. *Pediatr Res*. 1983;17(4):250-253.
4. Ponder E, Ponder RV. Protein concentration in normal mouse lymphocytes, thymocytes, and mouse and human leukemic cells as measured by interference microscopy. *J Gen Physiol*. 1959;42(3):571-577.
5. Boxio R, Bossenmeyer-Pourie C, Steinckwich N, Dournon C, Nusse O. Mouse bone marrow contains large numbers of functionally competent neutrophils. *J Leukoc Biol*. 2004;75(4):604-611.
6. Rosenbluth MJ, Lam WA, Fletcher DA. Force microscopy of nonadherent cells: a comparison of leukemia cell deformability. *Biophys J*. 2006;90(8):2994-3003.
7. van Furth R, Hirsch JG, Fedorko ME. Morphology and peroxidase cytochemistry of mouse promonocytes, monocytes, and macrophages. *J Exp Med*. 1970;132(4):794-812.
8. Downey GP, Doherty DE, Schwab B, 3rd, Elson EL, Henson PM, Worthen GS. Retention of leukocytes in capillaries: role of cell size and deformability. *J Appl Physiol* (1985). 1990;69(5):1767-1778.

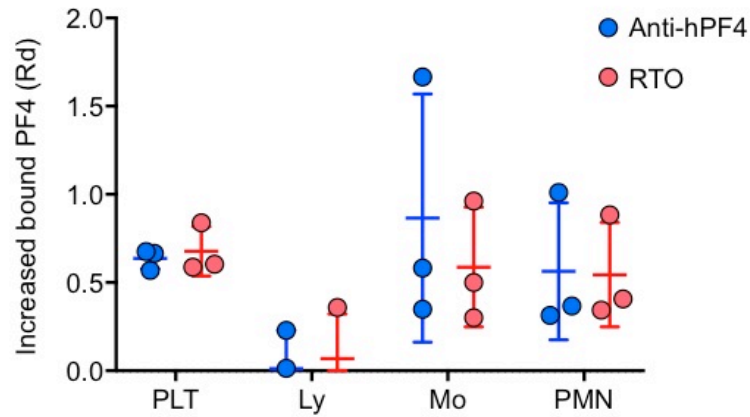

**Supplemental Figure 2: Binding of polyclonal anti-hPF4 and monoclonal RTO antibodies to PF4 released from activated platelets and distributed to other cells in whole human blood.** TFLLR-NH2 was added to whole human blood. Total cell surface-bound PF4 on platelets (PLT), monocytes (Mono), neutrophils (PMN), and lymphocytes (Lymph) was detected using Alex 488-labeled affinity purified rabbit polyclonal anti-hPF4 antibody or monoclonal antibody RTO. Data are expressed as increase of MFI after stimulation compared to unstimulated samples using distribution resolution metric ( $R_D$ ). The individual data points and mean  $\pm$  1 SD are shown. N = 3 each done in duplicates.
